# Supplementary material for: Association Between Phosphate and Long-term Outcome in CAD Patients Underwent Coronary Intervention
Source: Research Square preprint supplement (doi:10.21203/rs.3.rs-535266/v1), 2021-05-20
Supplement: Supplementary file 1 [file daefef4dddda2249c185876e.docx]

| Supplement Table 1  Factors associated with serum phosphate in multivariate linear regression | | | |
| --- | --- | --- | --- |
|  | Coefficient | 95% confidence interval | p value |
| Male Gender | -0.72 | -0.263~-0.66 | 0.01 |
| Age | -0.199 | -0.20~-0.13 | <0.001 |
| BMI | -0.003 | 0.889~-0.11 | 0.889 |
| Smoking (n, %) | -0.022 | -0.127~0.35 | 0.267 |
| Dyslipidemia (n, %) | 0.023 | -0.033~0.126 | 0.253 |
| Diabetes (n, %) | 0.024 | -0.035~0.147 | 0.231 |
| Hypertension (n, %) | 0.020 | -0.040~0.123 | 0.314 |
| Heart failure (n, %) | 0.031 | -0.19~0.176 | 0.113 |
| Stroke (n, %) | 0.043 | 0.021~0.294 | 0.024 |
| CKD (n, %) | 0.061 | 0.065~0.321 | 0.003 |
| ACS | 0.024 | -0.030~0.127 | 0.223 |
| eGFR | -0.185 | -0.008~-0.005 | <0.001 |
| HGB | -0.098 | -0.069~-0.024 | <0.001 |
| UA | 0.098 | 0.029~0.068 | <0.001 |
| CA | 0.114 | 0.109~0.220 | <0.001 |
| HDLC | 0.018 | -0.002~0.005 | 0.353 |
| LDLC | 0.031 | 0.000~0.002 | 0.116 |
| Beta blockers | -0.004 | -0.134~0.035 | 0.253 |
| ACEI/ARB | -0.025 | -0.134~0.035 | 0.253 |
| Statins | -0.023 | -0.132~0.041 | 0.298 |

BMI=body mass index, CKD=chronic kidney disease, ACS=acute coronary syndrome, HGB=hemoglobin, UA=uric acid, CA=calcium, HDLC=high density lipoprotein cholesterol, LDLC=low density lipoprotein cholesterol, ACEI/ARB= angiotensin converting enzyme inhibitor/ angiotensin receptor blockers

Supplement Figure 1.


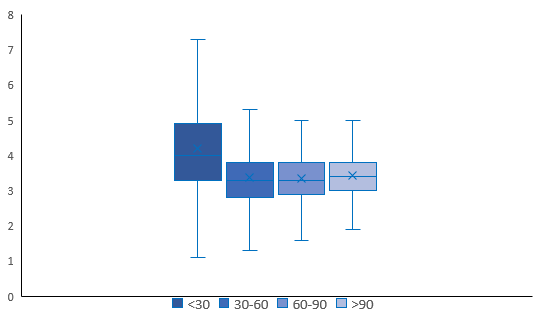


eGFR (ml/min/1.73m2)

Serum phosphate(mg/dL)

Supplement Figure 2.


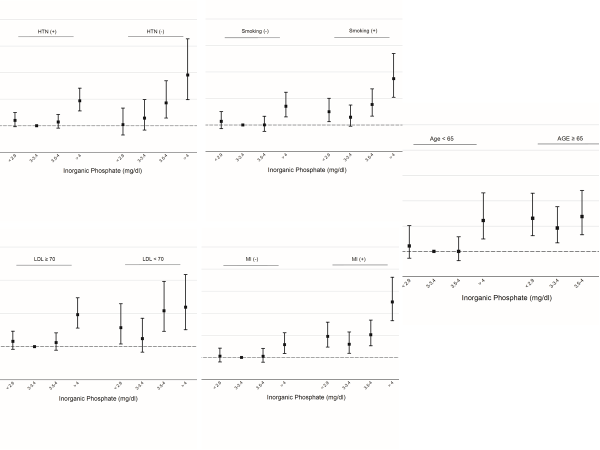


**Supplement Figure 1:** Relationship between serum phosphate and renal

function. Box–and–whisker plots of changes in serum phosphate

level according to the severity of renal dysfunction. The line within the

box denotes the median and the box spans the interquartile range

(25th to 75th percentiles). Whiskers extend from the 5th to 95th percentiles.

**Supplement Figure 2:** Prespecified subgroup analysis showing the relationship between serum phosphate quartile and the probability of the primary endpoint in different subgroups. HTN=hypertension, LDL=low density lipoprotein cholesterol, MI=presented as acute coronary syndrome.

**Authors’ contribution:**

Tsung-Ying Tsai MD. 1,2,3,6, Pai-Feng Hsu MD.PhD. 2.4.5.8, Cheng-Hsueh Wu MD. 4,7,8, Ya-Ling Yang MD. 7,8,Su-Chan Chen MD. 7,8, Shao-Sung Huang MD. 4,7,8, Wan Leong Chan MD. 4,5, Shing-Jong Lin MD. 4,5, Jaw-Wen Chen MD. 4,5, Ju-Pin Pan MD. 4,5,7, Min-Ji Charng MD. 4,5,7, Ying-Hwa Chen MD. 7,8, Tao-Cheng Wu MD. 7,8, Tse-Min Lu MD.7,8, Po-Hsun Huang MD. 7,8, Hao-Min Cheng MD. 4,7,8, Chin-Chou Huang MD. 4,7,8, Shih-Hsien Sung MD.7,8, Yenn-Jiang Lin MD. 5, and Hsin-Bang Leu MD. 1,2,4,5,7,8

Concept/design1,

Data analysis/interpretation2,

Drafting article3,

revision of article4,

Approval of article5,

Statistics6,

Data collection7,

Other(logistic)8
